# Supplementary material for: Constructing CuNi dual active sites on ZnIn2S4 for highly photocatalytic hydrogen evolution
Source: Royal Society of Chemistry journal article supplement (doi:10.1039/d0cy02371j), 2021-01-01
Supplement: d0cy02371j1.pdf [file d0cy02371j1.pdf]

## Supplementary Information

### **Constructing CuNi Dual Active Sites on ZnIn<sub>2</sub>S<sub>4</sub> for Highly Photocatalytic Hydrogen Evolution**

*Jingyi Jin<sup>†</sup>, Yanren Cao<sup>†</sup>, Ting Feng<sup>†</sup>, Yanxin Li<sup>†</sup>, Ruonan Wang<sup>†</sup>, Kaili Zhao<sup>†</sup>, Wei Wang<sup>†,§</sup>,  
Bohua Dong<sup>†,\*</sup>, Lixin Cao<sup>†,\*</sup>*

<sup>†</sup> School of Materials Science and Engineering, Ocean University of China, Qingdao 266100, China

<sup>§</sup> Aramco Research Center-Boston, Aramco Services Company, Cambridge, MA 02139, USA

\* Corresponding author. Tel.: +86 13864808725; fax: +86 0532 66781901

E-mail address: caolixin@ouc.edu.cn (Lixin Cao); [dongbohua@ouc.edu.cn](mailto:dongbohua@ouc.edu.cn) (Bohua Dong)

## EXPERIMENTAL SECTION

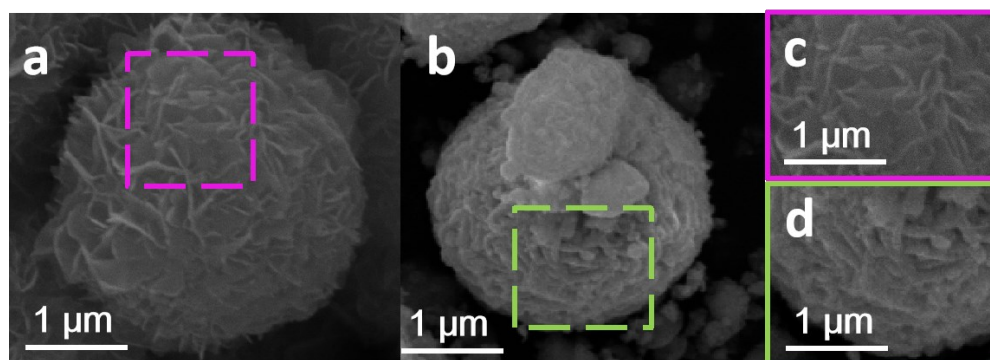

Fig. S1 SEM images of (a) pure ZnIn<sub>2</sub>S<sub>4</sub> and (b) 12% Cu<sub>2</sub>Ni<sub>1</sub>-ZIS. The enlarged images of (c) pure ZnIn<sub>2</sub>S<sub>4</sub> and (d) 12% Cu<sub>2</sub>Ni<sub>1</sub>-ZIS.

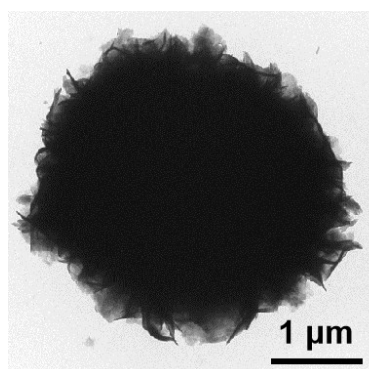

Fig. S2 TEM image of pure  $\text{ZnIn}_2\text{S}_4$ .

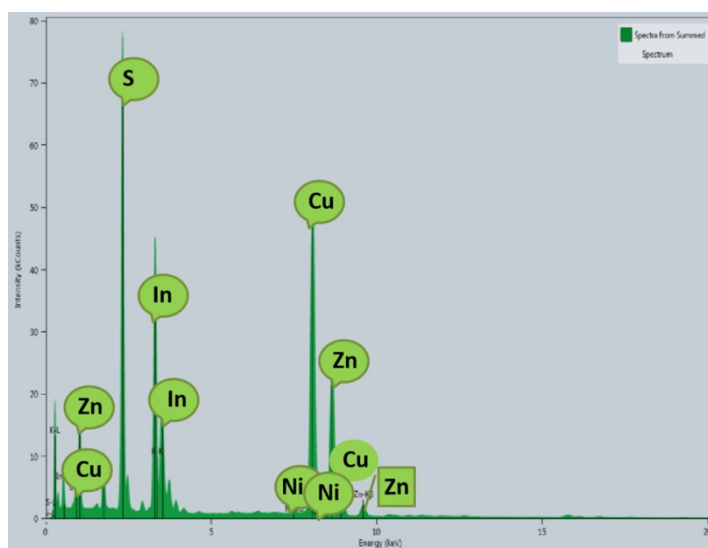

Fig. S3. The EDS spectrum of 12%  $\text{Cu}_2\text{Ni}_1$ -ZIS

Table S1. The surface element content from XPS characterization.

| Element                                                      | Atomic % | Element                                                      | Atomic % |
|--------------------------------------------------------------|----------|--------------------------------------------------------------|----------|
| S                                                            | 31.05    | Cu                                                           | 0.85     |
| Zn                                                           | 17.68    | Ni                                                           | 0.55     |
| In                                                           | 10.56    | C                                                            | 28.89    |
| N                                                            | 2.95     | O                                                            | 7.47     |
| Exact mass ratio of Cu to $\text{ZnIn}_2\text{S}_4 = 1.62\%$ |          | Exact mass ratio of Ni to $\text{ZnIn}_2\text{S}_4 = 0.97\%$ |          |

Table S2 Performance comparison of  $\text{ZnIn}_2\text{S}_4$  modified by different types of cocatalyst

| Category       | Cocatalyst        | Illumination conditions | Sacrifice agent                                                        | H <sub>2</sub> evolution Rate (μmol g <sup>-1</sup> ·h <sup>-1</sup> ) | α*          | Ref.             |
|----------------|-------------------|-------------------------|------------------------------------------------------------------------|------------------------------------------------------------------------|-------------|------------------|
| Bi-metals      | <b>Cu-Ni</b>      | <b>λ≥420 nm</b>         | <b>0.35 M Na<sub>2</sub>S<br/>0.25 M Na<sub>2</sub>SO<sub>3</sub></b>  | <b>7825</b>                                                            | <b>29.5</b> | <b>This work</b> |
|                | Co-Ni             | λ>420 nm                | Ascorbic acid                                                          | 3336.6                                                                 | 4.3         | [1]              |
|                | Co-P              | λ>420 nm                | Lactic acid                                                            | 7840                                                                   | 44.0        | [2]              |
| Noble metal    | Au                | λ>420 nm                | None                                                                   | 1633.4                                                                 | 4.41        | [3]              |
|                | Pt                | λ>420 nm                | 140 mmol Na <sub>2</sub> S<br>100 mmol Na <sub>2</sub> SO <sub>3</sub> | 1150                                                                   | 7.57        | [4]              |
| Metal oxides   | Ag <sub>2</sub> O | full spectrum           | Triethanolamine                                                        | 2334.19                                                                | 3.39        | [5]              |
|                | WO <sub>3</sub>   | λ>420 nm                | 0.25 M Na <sub>2</sub> SO <sub>3</sub><br>0.35 M Na <sub>2</sub> S     | 2202.9                                                                 | 5.22        | [6]              |
| Metal sulfides | MoS <sub>2</sub>  | λ>420 nm                | Lactic acid                                                            | 2512.5                                                                 | 8.73        | [7]              |
|                |                   | λ≥420 nm                | 0.43 M Na <sub>2</sub> S<br>0.5 M Na <sub>2</sub> SO <sub>3</sub>      | 2060                                                                   | 10.85       | [8]              |
|                | MoSe <sub>2</sub> | λ>420 nm                | Na <sub>2</sub> S, Na <sub>2</sub> SO <sub>3</sub>                     | 2228                                                                   | 2.18        | [9]              |
| Others         | Ni <sub>2</sub> P | λ≥400 nm                | Lactic acid                                                            | 2066                                                                   | 4.43        | [10]             |
|                | CQD-Pt            | λ>420 nm                | Triethanolamine                                                        | 1032.2                                                                 | 11.21       | [11]             |
|                | rGO-Pt            | λ>420 nm                | 0.25 M Na <sub>2</sub> SO <sub>3</sub><br>0.35 M Na <sub>2</sub> S     | 1210                                                                   | 26.3        | [12]             |

\* A parameter of α is adopted to describe the cocatalytic performance, which is defined by the quotient of the reaction rate of ZIS with cocatalysts and that of pure ZnIn<sub>2</sub>S<sub>4</sub> without cocatalysts in each paper.

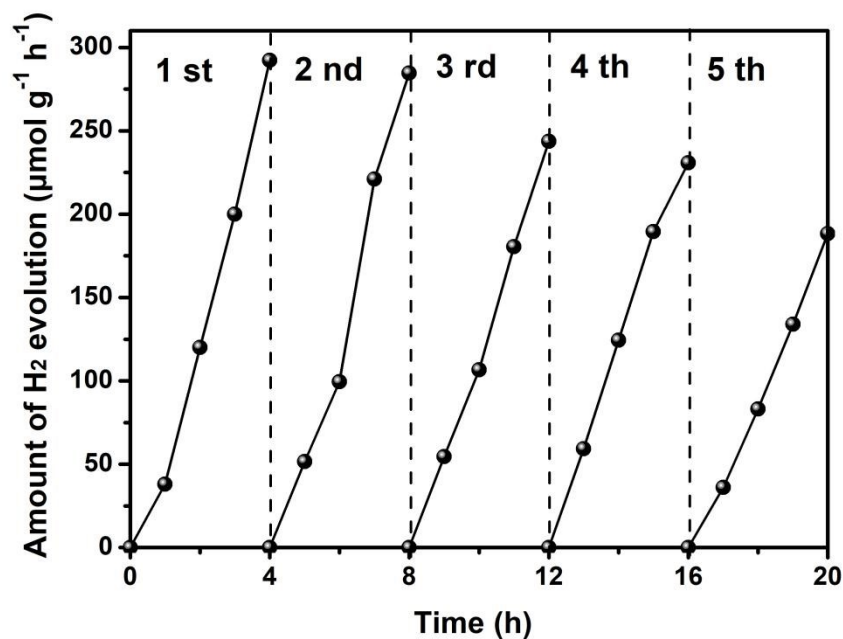

Figure S4. Stability test of pure ZnIn<sub>2</sub>S<sub>4</sub> under the same condition as mentioned in this paper

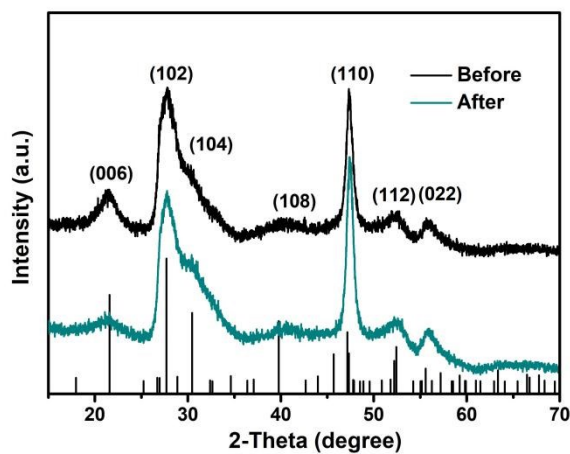

Figure S5. The XRD spectrum of 12% Cu<sub>2</sub>Ni<sub>1</sub>-ZIS before and after stability test

The XRD spectrum of 12% Cu<sub>2</sub>Ni<sub>1</sub>-ZIS after 20 h stability test didn't display evident characteristic peak migration compared with previous 12%Cu<sub>2</sub>Ni<sub>1</sub>-ZIS except the peak intensity of (006) lattice plane decreased a little.

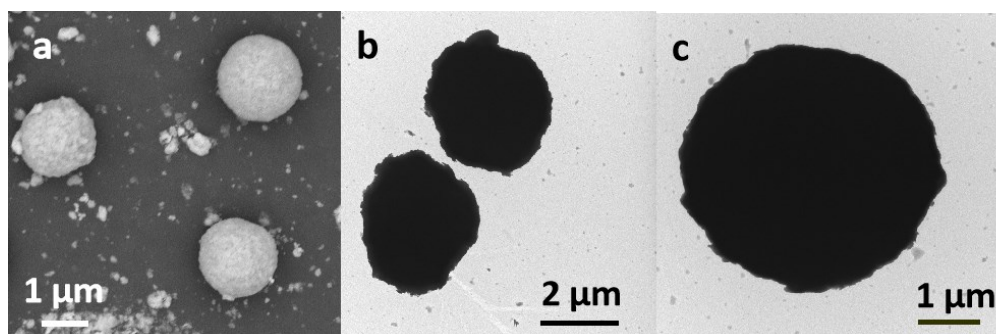

Fig. S6 (a) SEM (b-c) TEM images of 12% Cu<sub>2</sub>Ni<sub>1</sub>-ZIS after stability test.

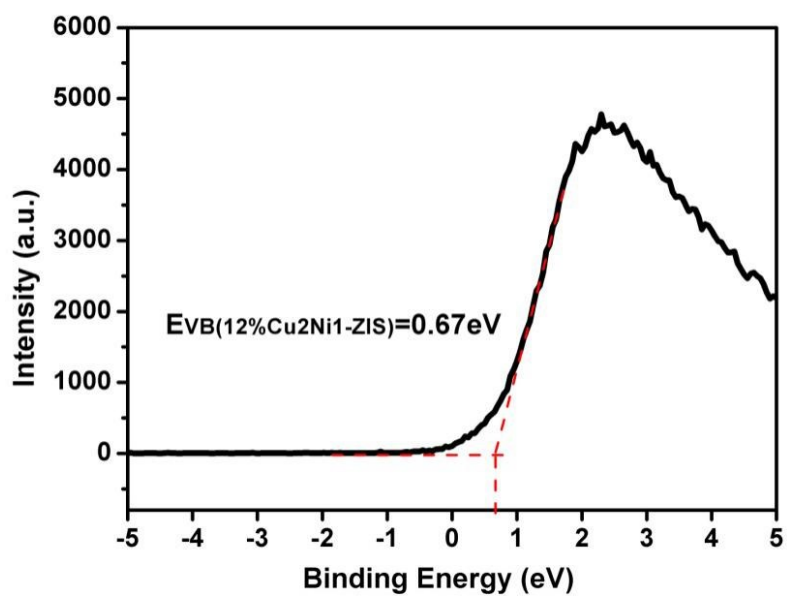

Figure S7 XPS valence band spectrum for 12%Cu<sub>2</sub>Ni<sub>1</sub>-ZIS showing the edge of valence band

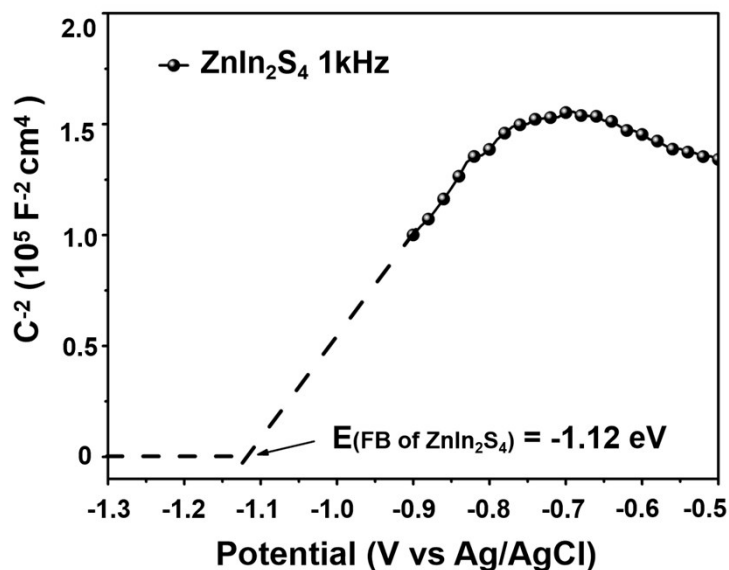

Figure S8 Mott-Schottky curve of pure ZnIn<sub>2</sub>S<sub>4</sub>

Mott-Schottky curves were taken at 1.0 kHz frequency. The potential ranged from -1.3 V to -0.5 V (vs. Ag/AgCl), and the modulation amplitude of 5 mV. The 0.5 M Na<sub>2</sub>SO<sub>4</sub> was used as the electrolyte solution.

According to Fig. S8, the flat band (FB) potential is -1.12 V (vs. Ag/AgCl). In general, the flat band potential of n-type semiconductors obtained from Mott-Schottky curves is about 0.2 V more positive than its conduction band potential [13]. Therefore, the conduction band potential of ZnIn<sub>2</sub>S<sub>4</sub> is about -1.32 V vs. Ag/AgCl. According to the following equation:

$$E_{FB}(vs. NHE) = E_{FB}(vs. Ag/AgCl) + 0.197$$

The conduction band of ZnIn<sub>2</sub>S<sub>4</sub> is -1.13 V vs. NHE. Combining its band gap (2.54 eV), the valence band potential of ZnIn<sub>2</sub>S<sub>4</sub> is 1.41 V vs. NHE.

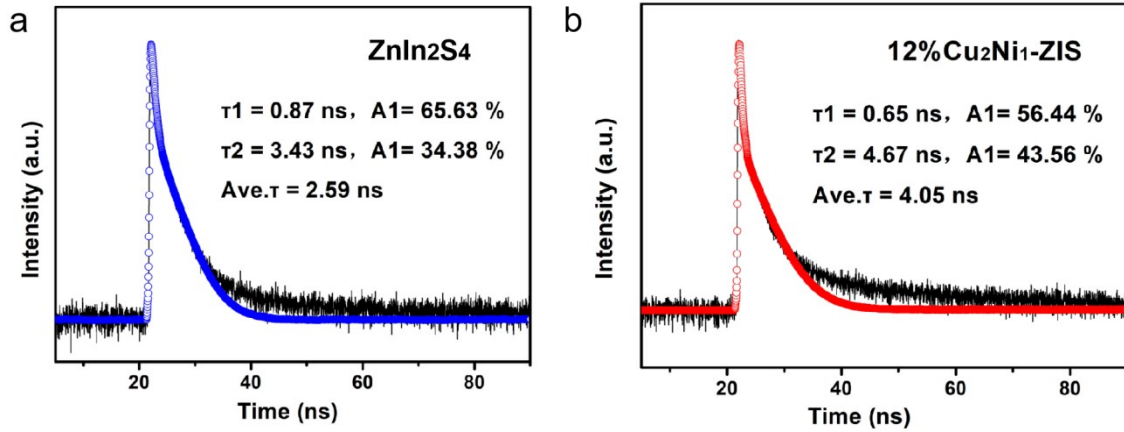

Figure S9 Transient-state photoluminescence spectra: (a) ZnIn<sub>2</sub>S<sub>4</sub> (b) 12% Cu<sub>2</sub>Ni<sub>1</sub>-ZIS

Table S3 Fluorescence emission lifetime and relevant percentage data of ZnIn<sub>2</sub>S<sub>4</sub> and 12%Cu<sub>2</sub>Ni<sub>1</sub>-ZIS

| Samples                                 | $\tau_1$ (ns) | $A_1$ (%) | $\tau_2$ (ns) | $A_2$ (%) | Average lifetime ( $\tau_a$ ) (ns) |
|-----------------------------------------|---------------|-----------|---------------|-----------|------------------------------------|
| ZnIn <sub>2</sub> S <sub>4</sub>        | 0.87          | 65.62     | 3.43          | 34.38     | 2.59                               |
| 12%Cu <sub>2</sub> Ni <sub>1</sub> -ZIS | 0.65          | 56.44     | 4.67          | 43.56     | 4.05                               |

The fitted parameters of the above transient-state photoluminescence spectra are acquired via the following bi-exponential formulas:

$$I(t) = I_0 + A_1 \exp(-t/\tau_1) + A_2 \exp(-t/\tau_2)$$





19100-19106.

(3) T.-T.Zhu, X.-J.Ye, Q.-Q. Zhang, Z.-Z. Hui, X.-C. Wang and S.-F. Chen, *J. Hazard Mater.*, 2019, **367**, 277-285.

(4) L. Shang, C. Zhou, T. Bian, H.-J. Yu, L.-Z. Wu, C.-H. Tung and T.-R.Zhang, *J. Mater. Chem. A*, 2013, **1**, 4552-4558.

(5) Y. Xiao, Z.-Y. Peng, W.-L.Zhang, Y.-H. Jiang and L. Ni, *Appl. Surf. Sci.* 2019, **494**, 519-531.

(6) P.-F. Tan, A.-Q.Zhu, L.-L. Qiao, W.-X. Zeng, Y.-J. Ma, H.-G. Dong, J.-P. Xie and J. Pan, *Inorg. Chem. Front.*, 2019, **6**, 929-939.

(7) C. Liu, B. Chai, C.-L. Wang, J.-T. Yan and Z.-D. Ren, *Int. J. Hydrogen Energy*, 2018, **43**, 6977-6986.

(8) L. Wei, Y.-J. Chen, Y.-P. Lin, H.-S. Wu, R.-S. Yuan and Z.-H. Li, *Appl. Catal. B Environ.* 2014, **144**, 521-527.

(9) D.-Q.Zeng, L. Xiao, W.-J. Ong, P.-Y. Wu, H.-F. Zheng, Y.-Z. Chen and D.-L.Peng, *Chemsuschem* 2017, **10**, 4624-4631.

(10) X.-L. Li, X.-J.Wang, J.-Y. Zhu, Y.-P. Li, J. Zhao and F.-T. Li, *Chem. Eng. J.*, 2018, **353**, 15-24.

(11) Q. Li, C. Cui, H. Meng and J.-G. Yu, *Chem. Asian J.*, 2014, **9**, 1766-1770.

(12) F. Tian, R.-S.Zhu, J. Zhong, P. Wang, F. Ouyang and G. Cao, *Int. J. Hydrogen Energy*, 2016, **41**, 20156-20171.

(13) J. Dong, Y. Shi, C.-P. Huang, Q. Wu, T. Zeng and W.-F. Yao, *Appl. Catal. B Environ.*, 2019, **243**, 27-35.
